# Supplementary material for: Machine Learning-Based Decision-Making in Geriatrics: Aging Phenotype Calculator and Survival Prognosis
Source: PubMed Central journal article supplement (PMC11745442; doi:10.14336/ad.2024.0120), 2024-01-20
Supplement: AD-16-1-565-s.pdf [file AD-16-1-565-s.pdf]

SUPPLEMENTARY DATA

# **Machine Learning-Based Decision-Making in Geriatrics: Aging Phenotype Calculator and Survival Prognosis**

**Aleksandra Mamchur, Natalia Sharashkina, Veronika Erema, Daria Kashtanova,  
Mikhail Ivanov, Maria Bruttan, Elena Zelenova, Eva Shelly, Valentina Ostapenko,  
Irina Dzhumaniazova, Lorena Matkava, Vladimir Yudin, Anna Akopyan, Irina Strazhesko,  
Lilit Maytesyan, Irina Tarasova, Olga Beloshevskaya, Anton Keskinov, Sergey Kraevoy,  
Olga Tkacheva, Sergey Yudin**

# SUPPLEMENTARY DATA

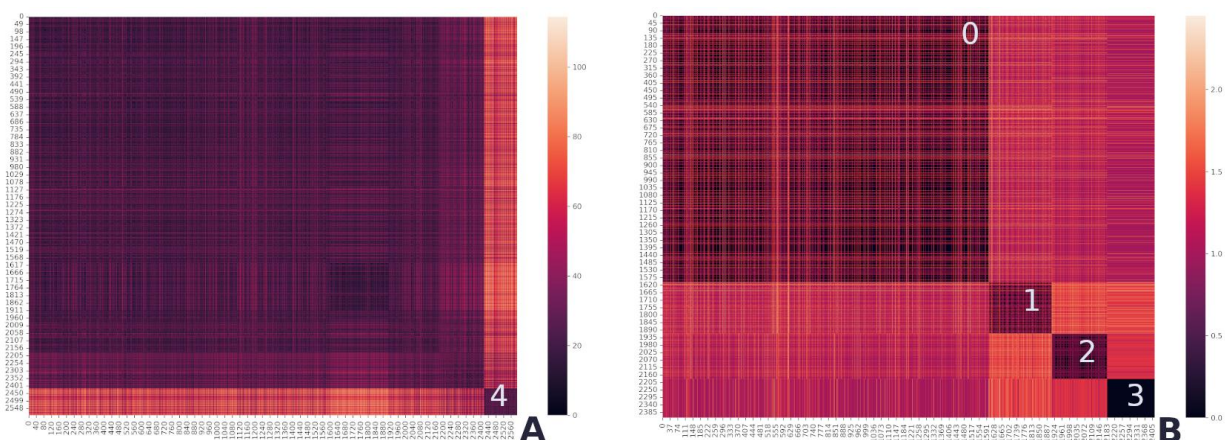

**Supplementary Figure 1.** Euclidean distance matrix for the first (A) and second (B) clustering steps.

**Supplementary Table 1.** Physical examination and laboratory testing results in different aging phenotypes (only significant).

| Cluster                                      | 0                                   | 1                         | 2                                | 3                                | 4                                 | p-value (Kruskal test) |
|----------------------------------------------|-------------------------------------|---------------------------|----------------------------------|----------------------------------|-----------------------------------|------------------------|
| <b>Phenotype</b>                             | <b>Multimorbid frailty (n=1602)</b> | <b>Non-frail (n=309)</b>  | <b>Metabolic frailty (N=272)</b> | <b>Cognitive frailty (N=234)</b> | <b>Functional frailty (n=175)</b> |                        |
| <b>Indicator</b>                             | Me [Q1-Q3]                          | Me [Q1-Q3]                | Me [Q1-Q3]                       | Me [Q1-Q3]                       | Me [Q1-Q3]                        |                        |
| <b>Current health indicators</b>             |                                     |                           |                                  |                                  |                                   |                        |
| <b>Right hand grip strength</b>              | 13.00 [10.00 - 16.00]               | 13.00 [10.00 - 18.50]     | 13.00 [10.00 - 16.50]            | 10.00 [7.00 - 13.50]             | 7.50 [4.00 - 11.50]               | 4.9*10 <sup>-46</sup>  |
| <b>Left hand grip strength</b>               | 12.00 [9.00 - 15.05]                | 13.50 [9.00 - 18.00]      | 12.00 [9.00 - 16.00]             | 9.00 [7.00 - 12.00]              | 6.25 [3.50 - 10.00]               | 1.3*10 <sup>-52</sup>  |
| <b>Systolic blood pressure</b>               | 135.00 [126.00 - 146.00]            | 138.00 [127.00 - 150.00]  | 135.50 [127.00 - 148.75]         | 130.00 [120.00 - 150.00]         | 130.00 [110.00 - 140.00]          | 3.1*10 <sup>-5</sup>   |
| <b>BMI</b>                                   | 25.50 [23.40 - 28.30]               | 24.80 [23.10 - 27.60]     | 26.60 [24.20 - 30.40]            | 25.15 [22.92 - 27.70]            | 24.20 [21.00 - 27.50]             | 1.7*10 <sup>-8</sup>   |
| <b>Waist circumference</b>                   | 92.00 [86.00 - 98.00]               | 92.00 [82.00 - 98.00]     | 95.00 [87.00 - 103.00]           | 89.50 [80.00 - 98.00]            | 90.00 [79.00 - 98.00]             | 2.1*10 <sup>-5</sup>   |
| <b>13B-T (total bilirubin)</b>               | 8.90 [6.67 - 12.40]                 | 10.50 [7.45 - 14.22]      | 8.25 [6.50 - 11.17]              | 8.90 [6.90 - 12.60]              | 8.30 [6.40 - 11.15]               | 6.8*10 <sup>-4</sup>   |
| <b>1631NTP (NT-proBNP)</b>                   | 621.50 [310.00 - 1489.00]           | 507.00 [256.00 - 1093.00] | 546.50 [302.00 - 1130.75]        | 740.00 [390.00 - 1669.00]        | 787.00 [368.50 - 1774.75]         | 0.007                  |
| <b>16GLU (glucose)</b>                       | 5.00 [4.50 - 5.60]                  | 5.10 [4.60 - 5.70]        | 5.80 [5.00 - 7.57]               | 5.10 [4.70 - 5.70]               | 4.90 [4.50 - 5.70]                | 2.4*10 <sup>-20</sup>  |
| <b>172INS (insulin)</b>                      | 6.60 [4.60 - 10.17]                 | 7.20 [4.90 - 11.10]       | 7.20 [4.93 - 11.53]              | 6.60 [4.40 - 11.20]              | 5.15 [3.60 - 8.72]                | 2.9*10 <sup>-4</sup>   |
| <b>174S-C (IGF-1)</b>                        | 99.40 [77.93 - 131.55]              | 105.75 [81.80 - 136.03]   | 109.80 [88.10 - 144.20]          | 99.70 [78.62 - 133.38]           | 90.85 [65.58 - 124.75]            | 2.6*10 <sup>-4</sup>   |
| <b>18HBA1 (HbA1c (glycated haemoglobin))</b> | 5.60 [5.40 - 5.90]                  | 5.60 [5.40 - 5.90]        | 6.30 [5.70 - 7.15]               | 5.60 [5.30 - 5.80]               | 5.50 [5.30 - 5.80]                | 2.8*10 <sup>-44</sup>  |
| <b>22CRE (creatinine)</b>                    | 86.00 [72.25 - 105.75]              | 88.00 [75.00 - 108.00]    | 87.00 [72.00 - 105.75]           | 88.00 [73.00 - 109.00]           | 76.00 [61.00 - 100.25]            | 0.005                  |

# SUPPLEMENTARY DATA

|                                                 |                          |                          |                          |                          |                          |                       |
|-------------------------------------------------|--------------------------|--------------------------|--------------------------|--------------------------|--------------------------|-----------------------|
| <b>28TP (total protein)</b>                     | 69.00 [64.00 - 74.00]    | 69.00 [65.00 - 74.00]    | 70.00 [64.00 - 74.00]    | 69.00 [66.00 - 74.00]    | 67.00 [61.00 - 71.00]    | 0.03                  |
| <b>29A1 (alpha-1-globulin)</b>                  | 3.10 [2.80 - 3.50]       | 3.00 [2.70 - 3.30]       | 3.10 [2.80 - 3.50]       | 3.20 [2.80 - 3.60]       | 3.30 [3.00 - 3.70]       | 3.9*10 <sup>-5</sup>  |
| <b>30TG (triglycerides)</b>                     | 1.15 [0.89 - 1.48]       | 1.12 [0.89 - 1.54]       | 1.31 [0.96 - 1.81]       | 1.14 [0.87 - 1.49]       | 1.16 [0.84 - 1.49]       | 0.004                 |
| <b>32HDL (HDL)</b>                              | 1.25 [1.05 - 1.53]       | 1.27 [1.01 - 1.57]       | 1.15 [0.94 - 1.45]       | 1.26 [1.07 - 1.51]       | 1.11 [0.96 - 1.36]       | 1.3*10 <sup>-5</sup>  |
| <b>51FERR (ferritin)</b>                        | 62.00 [32.00 - 112.50]   | 70.00 [36.50 - 121.00]   | 60.00 [30.00 - 115.00]   | 65.50 [34.25 - 118.50]   | 97.00 [41.00 - 175.00]   | 0.037                 |
| <b>53FT3 (free T3)</b>                          | 3.60 [3.20 - 4.00]       | 3.70 [3.30 - 4.00]       | 3.50 [3.10 - 3.80]       | 3.60 [3.20 - 3.90]       | 3.40 [2.90 - 3.80]       | 1.2*10 <sup>-5</sup>  |
| <b>5PLT (platelets)</b>                         | 220.00 [183.00 - 266.75] | 205.00 [171.75 - 244.50] | 219.00 [177.00 - 278.00] | 225.00 [184.00 - 279.00] | 226.00 [181.00 - 274.00] | 0.025                 |
| <b>8ALT (alanine transaminase)</b>              | 11.00 [9.00 - 15.00]     | 12.00 [10.00 - 16.00]    | 12.00 [9.00 - 16.00]     | 11.00 [8.00 - 15.00]     | 9.50 [7.00 - 14.00]      | 1*10 <sup>-4</sup>    |
| <b>928VD3 (25(OH) D, vitamin D)</b>             | 9.00 [6.00 - 14.00]      | 11.00 [7.00 - 16.00]     | 9.00 [6.00 - 14.00]      | 8.00 [5.00 - 11.00]      | 7.00 [5.00 - 11.00]      | 5.1*10 <sup>-12</sup> |
| <b>9AST (aspartate aminotransferase)</b>        | 18.00 [15.00 - 21.00]    | 18.00 [16.00 - 21.00]    | 16.00 [14.00 - 20.00]    | 17.00 [15.00 - 22.00]    | 16.00 [14.00 - 19.00]    | 4.6*10 <sup>-6</sup>  |
| <b>ALB-PF (albumin)</b>                         | 38.40 [35.40 - 41.30]    | 39.50 [35.90 - 42.10]    | 38.80 [35.90 - 41.40]    | 38.40 [34.70 - 41.00]    | 35.00 [32.18 - 38.00]    | 3.8*10 <sup>-17</sup> |
| <b>ALB/CRU (urine albumin-creatinine ratio)</b> | 22.00 [12.00 - 45.75]    | 23.00 [11.00 - 47.50]    | 34.00 [16.00 - 67.50]    | 31.00 [14.00 - 62.00]    | 35.00 [16.00 - 82.00]    | 0.007                 |
| <b>hsCRP</b>                                    | 2.69 [1.27 - 6.85]       | 2.29 [1.14 - 6.04]       | 2.9 [1.29 - 6.65]        | 2.59 [1.11 - 7.19]       | 4.19 [1.64 - 12.83]      | 0,044                 |

**Supplementary Table 2. Pairwise phenotype comparison**

| Cluster                              | 0VS1                                                                                | 0VS2  | 0VS3                   | 0VS4                   | 1VS2                  | 1VS3                  | 1VS4                  | 2VS3                  | 2VS4                  | 3VS4                  |
|--------------------------------------|-------------------------------------------------------------------------------------|-------|------------------------|------------------------|-----------------------|-----------------------|-----------------------|-----------------------|-----------------------|-----------------------|
| <b>Indicator</b>                     | p-value of pairwise comparisons (Mann-Whitney U test) adjusted for multiple testing |       |                        |                        |                       |                       |                       |                       |                       |                       |
| <b>MMSE</b>                          | 1.3*10 <sup>-8</sup>                                                                | 0.026 | 2.3*10 <sup>-121</sup> | 1.5*10 <sup>-36</sup>  | 1.8*10 <sup>-10</sup> | 5.2*10 <sup>-77</sup> | 2.9*10 <sup>-34</sup> | 1.1*10 <sup>-48</sup> | 3.7*10 <sup>-15</sup> | 1                     |
| <b>FAB</b>                           | 1                                                                                   | 1     | 8.6*10 <sup>-52</sup>  | 2.7*10 <sup>-42</sup>  | 0.36                  | 5.7*10 <sup>-38</sup> | 4.5*10 <sup>-32</sup> | 6.7*10 <sup>-24</sup> | 1.5*10 <sup>-22</sup> | 1                     |
| <b>MNA</b>                           | 0.77                                                                                | 1     | 1.1*10 <sup>-15</sup>  | 5.4*10 <sup>-41</sup>  | 1                     | 2.3*10 <sup>-16</sup> | 2.0*10 <sup>-33</sup> | 8.9*10 <sup>-9</sup>  | 1.7*10 <sup>-27</sup> | 6*10 <sup>-9</sup>    |
| <b>Right hand hand grip strength</b> | 1                                                                                   | 1     | 1.6*10 <sup>-14</sup>  | 1.2*10 <sup>-34</sup>  | 1                     | 2.8*10 <sup>-10</sup> | 5.4*10 <sup>-25</sup> | 4.2*10 <sup>-7</sup>  | 5.5*10 <sup>-21</sup> | 2.4*10 <sup>-6</sup>  |
| <b>Left hand hand grip strength</b>  | 1                                                                                   | 1     | 8.5*10 <sup>-16</sup>  | 5.7*10 <sup>-38</sup>  | 1                     | 4.1*10 <sup>-14</sup> | 1.5*10 <sup>-30</sup> | 2.3*10 <sup>-7</sup>  | 6.1*10 <sup>-23</sup> | 1*10 <sup>-7</sup>    |
| <b>SPPB</b>                          | 5.6*10 <sup>-164</sup>                                                              | 0.149 | 2.9*10 <sup>-23</sup>  | 2.2*10 <sup>-74</sup>  | 9.4*10 <sup>-95</sup> | 1.6*10 <sup>-87</sup> | 3.1*10 <sup>-74</sup> | 6*10 <sup>-7</sup>    | 1.8*10 <sup>-45</sup> | 2.1*10 <sup>-25</sup> |
| <b>Barthel</b>                       | 4.4*10 <sup>-43</sup>                                                               | 1     | 3.9*10 <sup>-22</sup>  | 2.2*10 <sup>-103</sup> | 6.4*10 <sup>-35</sup> | 1.7*10 <sup>-50</sup> | 2.5*10 <sup>-73</sup> | 1.4*10 <sup>-8</sup>  | 6.5*10 <sup>-69</sup> | 9*10 <sup>-64</sup>   |
| <b>IADL</b>                          | 1.5*10 <sup>-27</sup>                                                               | 1     | 1.6*10 <sup>-21</sup>  | 1.9*10 <sup>-79</sup>  | 3.4*10 <sup>-20</sup> | 5*10 <sup>-35</sup>   | 4.3*10 <sup>-64</sup> | 8*10 <sup>-9</sup>    | 2.6*10 <sup>-47</sup> | 1.6*10 <sup>-15</sup> |
| <b>GDS-5</b>                         | 0.617                                                                               | 1     | 6.5*10 <sup>-18</sup>  | 2.2*10 <sup>-37</sup>  | 0.002                 | 6*10 <sup>-21</sup>   | 1.9*10 <sup>-35</sup> | 2.4*10 <sup>-5</sup>  | 2.9*10 <sup>-19</sup> | 5.5*10 <sup>-5</sup>  |

# SUPPLEMENTARY DATA

|                                                |                       |                       |                       |                       |                       |                       |                       |                       |                       |                       |
|------------------------------------------------|-----------------------|-----------------------|-----------------------|-----------------------|-----------------------|-----------------------|-----------------------|-----------------------|-----------------------|-----------------------|
| Assistance in social and everyday living scale | 1.5*10 <sup>-18</sup> | 1                     | 7.1*10 <sup>-21</sup> | 7.4*10 <sup>-95</sup> | 1.9*10 <sup>-12</sup> | 1.3*10 <sup>-34</sup> | 2.3*10 <sup>-72</sup> | 5.3*10 <sup>-10</sup> | 1.1*10 <sup>-59</sup> | 7.2*10 <sup>-42</sup> |
| Systolic blood pressure                        | 1                     | 1                     | 1                     | 1*10 <sup>-5</sup>    | 1                     | 1                     | 3.6*10 <sup>-5</sup>  | 1                     | 0.001                 | 0.075                 |
| Diastolic blood pressure                       | 1                     | 1                     | 1                     | 0.193                 | 1                     | 1                     | 0.339                 | 1                     | 0.186                 | 0.018                 |
| BMI                                            | 1                     | 0.002                 | 1                     | 0.002                 | 5.6*10 <sup>-4</sup>  | 1                     | 0.962                 | 0.007                 | 2.8*10 <sup>-7</sup>  | 1                     |
| Waist circumference                            | 1                     | 0.09                  | 0.068                 | 1                     | 0.047                 | 1                     | 1                     | 1*10 <sup>-4</sup>    | 0.125                 | 1                     |
| Total bilirubin                                | 0.016                 | 1                     | 1                     | 1                     | 0.001                 | 1                     | 0.006                 | 1                     | 1                     | 1                     |
| Homocysteine                                   | 1                     | 1                     | 0.01                  | 1                     | 1                     | 0.006                 | 1                     | 7.8*10 <sup>-4</sup>  | 1                     | 1                     |
| NT-proBNP                                      | 1                     | 1                     | 1                     | 1                     | 1                     | 0.037                 | 0.157                 | 0.546                 | 1                     | 1                     |
| Glucose                                        | 1                     | 1.7*10 <sup>-21</sup> | 1                     | 1                     | 4.2*10 <sup>-9</sup>  | 1                     | 1                     | 9.3*10 <sup>-7</sup>  | 3.2*10 <sup>-8</sup>  | 1                     |
| Insulin                                        | 1                     | 1                     | 1                     | 0.018                 | 1                     | 1                     | 0.001                 | 1                     | 2.5*10 <sup>-4</sup>  | 0.422                 |
| IGF-1                                          | 1                     | 0.027                 | 1                     | 1                     | 1                     | 1                     | 0.054                 | 1                     | 0.001                 | 1                     |
| HbA1c (glycated haemoglobin, Hb)               | 1                     | 5.5*10 <sup>-41</sup> | 1                     | 0.068                 | 7.5*10 <sup>-23</sup> | 1                     | 0.104                 | 5.3*10 <sup>-24</sup> | 5*10 <sup>-22</sup>   | 1                     |
| Creatinine                                     | 1                     | 1                     | 1                     | 0.005                 | 1                     | 1                     | 0.002                 | 1                     | 0.185                 | 0.017                 |
| Total protein                                  | 1                     | 1                     | 1                     | 0.024                 | 1                     | 1                     | 0.011                 | 1                     | 0.249                 | 0.074                 |
| alpha-1-globulin                               | 1                     | 1                     | 1                     | 0.028                 | 1                     | 0.012                 | 1.2*10 <sup>-4</sup>  | 1                     | 0.145                 | 1                     |
| Triglycerides                                  | 1                     | 4.7*10 <sup>-4</sup>  | 1                     | 1                     | 0.312                 | 1                     | 1                     | 0.024                 | 0.607                 | 1                     |
| HDL                                            | 1                     | 0.004                 | 1                     | 0.003                 | 0.149                 | 1                     | 0.067                 | 1                     | 1                     | 0.466                 |
| Ferritin                                       | 1                     | 1                     | 1                     | 0.012                 | 1                     | 1                     | 1                     | 1                     | 0.114                 | 1                     |
| Free T3                                        | 1                     | 1                     | 1                     | 0.001                 | 0.03                  | 1                     | 1.6*10 <sup>-5</sup>  | 1                     | 1                     | 0.069                 |
| Platelets                                      | 0.038                 | 1                     | 1                     | 1                     | 1                     | 0.020                 | 0.605                 | 1                     | 1                     | 1                     |
| Testosterone                                   | 6.7*10 <sup>-4</sup>  | 1                     | 1                     | 1                     | 1.5*10 <sup>-5</sup>  | 0.043                 | 8.2*10 <sup>-5</sup>  | 1                     | 1                     | 1                     |
| Alanine transaminase                           | 1                     | 1                     | 1                     | 0.004                 | 1                     | 1                     | 6.6*10 <sup>-5</sup>  | 1                     | 0.03                  | 1                     |
| Vitamin D (25(OH) D)                           | 0.004                 | 1                     | 0.01                  | 4*10 <sup>-4</sup>    | 1                     | 1.1*10 <sup>-7</sup>  | 2.4*10 <sup>-8</sup>  | 0.091                 | 0.005                 | 1                     |
| Albumin in the urine (concentration)           | 1                     | 1                     | 1                     | 0.14                  | 1                     | 1                     | 0.843                 | 1                     | 1                     | 1ju                   |
| Aspartate aminotransferase                     | 1                     | 0.022                 | 1                     | 0.002                 | 0.009                 | 1                     | 3*10 <sup>-4</sup>    | 1                     | 1                     | 0.674                 |
| Albumin                                        | 0.665                 | 1                     | 1                     | 2*10 <sup>-14</sup>   | 1                     | 0.229                 | 1.7*10 <sup>-16</sup> | 1                     | 2.8*10 <sup>-12</sup> | 2.6*10 <sup>-6</sup>  |
| ALB/CRU (urine albumin-creatinine ratio)       | 1                     | 0.047                 | 1                     | 1                     | 1                     | 1                     | 1                     | 1                     | 1                     | 1                     |
| hsCRP                                          | 1                     | 1                     | 1                     | 0.025                 | 1                     | 1                     | 0.0098                | 1                     | 0.93                  | 0.49                  |
| Monocytes, %                                   | 1                     | 0.095                 | 1                     | 0.001                 | 0.001                 | 0.127                 | 8.9*10 <sup>-6</sup>  | 1                     | 1                     | 1                     |

# SUPPLEMENTARY DATA

**Supplementary Table 3.** Frequency of occurrence of the APOE genotypes

| Genotype | Cluster 0<br>(1,602) | Cluster 1<br>(309) | Cluster 2<br>(272) | Cluster 3<br>(234) | Cluster 4<br>(175) | Entire<br>sample | p-value (chi<br>square) |
|----------|----------------------|--------------------|--------------------|--------------------|--------------------|------------------|-------------------------|
| ε2ε2     | 19 (1.2%)            | 6 (1.9%)           | 1 (0.4%)           | 3 (1.3%)           | 2 (1.1%)           | 31 (1.2%)        | 0.005                   |
| ε2ε3     | 228<br>(14.2%)       | 56 (18.1%)         | 40 (14.7%)         | 41 (17.5%)         | 33 (18.9%)         | 398<br>(15.3%)   |                         |
| ε2ε4     | 18 (1.1%)            | 4 (1.3%)           | 3 (1.1%)           | 3 (1.3%)           | 5 (2.9%)           | 33 (1.3%)        |                         |
| ε3ε3     | 1166<br>(72.5%)      | 218<br>(70.6%)     | 204 (75%)          | 144<br>(61.5%)     | 109<br>(62.3%)     | 1841<br>(70.8%)  |                         |
| ε3ε4     | 165<br>(10.3%)       | 25 (8.1%)          | 23 (8.5%)          | 40 (1.3%)          | 26 (14.9%)         | 279<br>(10.7%)   |                         |
| ε4ε4     | 6 (0.4%)             | 0 (-)              | 1 (0.4%)           | 3 (1.3%)           | 0 (-)              | 10 (0.4%)        |                         |

**Supplementary Table 4.** Results of logistic regression using APOE genotypes

| Cluster | ε2      |         | ε4      |         |
|---------|---------|---------|---------|---------|
|         | coef    | p-value | coef    | p-value |
| 0       | -0.2257 | 0.3     | -0.1519 | 1       |
| 1       | 0.3008  | 0.47    | -0.4823 | 0.2     |
| 2       | -0.1286 | 1       | -0.2805 | 1       |
| 3       | 0.1423  | 1       | 0.6885  | 0.001   |
| 4       | 0.2959  | 1       | 0.5721  | 0.07    |

**Supplementary Table 5.** Comparison of the socioeconomic backgrounds (only significant)

| Cluster                       | 0                                                 | 1                    | 2                               | 3                               | 4                                | p-value<br>(chi<br>square) |           |
|-------------------------------|---------------------------------------------------|----------------------|---------------------------------|---------------------------------|----------------------------------|----------------------------|-----------|
| <b>Phenotype</b>              | Multimorbid<br>frailty<br>(n=1,602)               | Non-frail<br>(n=309) | Metabolic<br>frailty<br>(n=272) | Cognitive<br>frailty<br>(n=234) | Functional<br>frailty<br>(n=175) |                            |           |
| <b>Параметр</b>               | n (%)                                             | n (%)                | n (%)                           | n (%)                           | n (%)                            |                            |           |
| <b>Lifelong<br/>residence</b> | Rural                                             | 87 (5.7%)            | 19 (6.7%)                       | 6 (2.3%)                        | 14 (6.8%)                        | 22 (15.8%)                 | 3*10-4    |
|                               | Urban                                             | 1418<br>(94.3%)      | 264 (93.3%)                     | 253 (97.7%)                     | 191 (93.2%)                      | 117 (84.2%)                |           |
| <b>Education</b>              | Primary school or<br>unfinished primary<br>school | 94 (5.8%)            | 27 (8.7%)                       | 18 (6.6%)                       | 35 (15.2%)                       | 23 (13.2%)                 | 3.46*10-7 |
|                               | Middle school or<br>unfinished middle<br>school   | 197 (12.3%)          | 23 (7.4%)                       | 36 (13.2%)                      | 36 (15.6%)                       | 28 (16.1%)                 |           |
|                               | Complete high<br>school                           | 271 (17%)            | 46 (14.9%)                      | 48 (17.7%)                      | 56 (24.2%)                       | 32 (18.4%)                 |           |
|                               | Vocational school                                 | 135 (8.4%)           | 25 (8.1%)                       | 15 (5.5%)                       | 13 (5.6%)                        | 4 (2.3%)                   |           |
|                               | Training school                                   | 278 (17.4%)          | 38 (12.3%)                      | 44 (16.2%)                      | 30 (13%)                         | 27 (15.5%)                 |           |
|                               | Undergraduate                                     | 23 (1.4%)            | 3 (1%)                          | 6 (2.2%)                        | 1 (0.4%)                         | 4 (2.3%)                   |           |
|                               | Graduate                                          | 557 (35%)            | 140 (45.3%)                     | 93 (34.2%)                      | 55 (23.8%)                       | 53 (30.5%)                 |           |
| Postgraduate                  | 43 (2.7%)                                         | 7 (2.3%)             | 12 (4.4%)                       | 5 (2.2%)                        | 3 (1.7%)                         |                            |           |
| <b>Occupation</b>             | Primarily physical                                | 370 (23.3%)          | 78 (25.6%)                      | 62 (22.9%)                      | 83 (35.8%)                       | 54 (31.2%)                 | 0.018     |
|                               | Primarily<br>intellectual                         | 582 (36.7%)          | 120 (39.3%)                     | 111 (41%)                       | 71 (30.6%)                       | 67 (39.6%)                 |           |
|                               | Intellectual +<br>physical                        | 636 (40%)            | 107 (35.1%)                     | 98 (36.1%)                      | 78 (33.6%)                       | 48 (28.4%)                 |           |
| <b>Peak<br/>income</b>        | Low                                               | 109 (7.2%)           | 26 (9.2%)                       | 16 (6.2%)                       | 32 (15.6%)                       | 28 (20.3%)                 | 1.6*10-9  |

# SUPPLEMENTARY DATA

|                       |        |             |            |             |             |            |       |
|-----------------------|--------|-------------|------------|-------------|-------------|------------|-------|
|                       | Medium | 1235 (82%)  | 201 (71%)  | 211 (81.5%) | 153 (74.6%) | 87 (63%)   |       |
|                       | High   | 162 (10.8%) | 56 (19.8%) | 32 (12.3%)  | 20 (9.8%)   | 23 (16.7%) |       |
| <b>Lifelong hobby</b> | No     | 832 (56.1%) | 182 (65%)  | 129 (49.6%) | 140 (69.3%) | 79 (58.1%) | 0.002 |
|                       | Yes    | 652 (43.9%) | 98 (35%)   | 131 (50.4%) | 62 (30.7%)  | 57 (41.9%) |       |

**Supplementary Table 6.** Effects of the background and socioeconomic background on the aging phenotype (based on logistic regression adjusted for age and sex).

| Indicator            | Non-frailty |             | Multimorbid frailty |              | Metabolic frailty |       | Cognitive frailty |              | Functional frailty |                            |
|----------------------|-------------|-------------|---------------------|--------------|-------------------|-------|-------------------|--------------|--------------------|----------------------------|
|                      | OR          | p-val       | OR                  | p-val        | OR                | p-val | OR                | p-val        | OR                 | p-val                      |
| Residence            | 1.21        | 1           | 0.84                | 1            | 2.94              | 0.319 | 0.92              | 1            | <b>0.34</b>        | <b>6.2*10<sup>-4</sup></b> |
| Graduate/un graduate | 1.00        | 1           | 1.41                | 0.196        | 1.18              | 1     | <b>0.58</b>       | <b>0.013</b> | 0.83               | 1                          |
| Intellectual work    | 0.95        | 1           | 1.19                | 1            | 1.19              | 1     | 0.7               | 0.504        | 1.08               | 1                          |
| High peak income     | 0.69        | 0.095       | <b>1.72</b>         | <b>0.041</b> | 1.11              | 1     | 0.83              | 1            | 1.54               | 1                          |
| Low peak income      | <b>0.59</b> | <b>0.01</b> | 1.27                | 1            | 0.62              | 1     | 1.9               | 0.064        | <b>2.65</b>        | <b>7*10<sup>-4</sup></b>   |
| Lifelong hobby       | 1.19        | 1           | 0.75                | 0.983        | 1.44              | 0.172 | <b>0.53</b>       | <b>0.006</b> | 0.91               | 1                          |

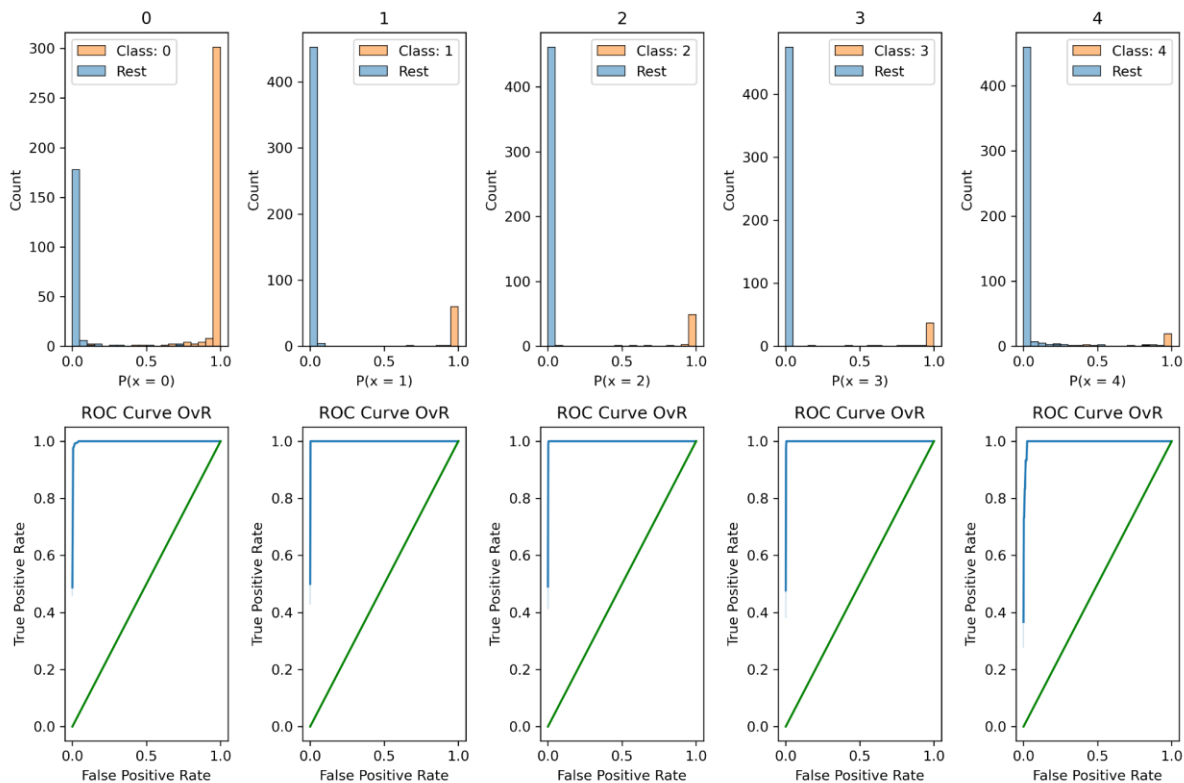

**Supplementary Figure 2.** Calculator quality assessment on the test set.

# SUPPLEMENTARY DATA

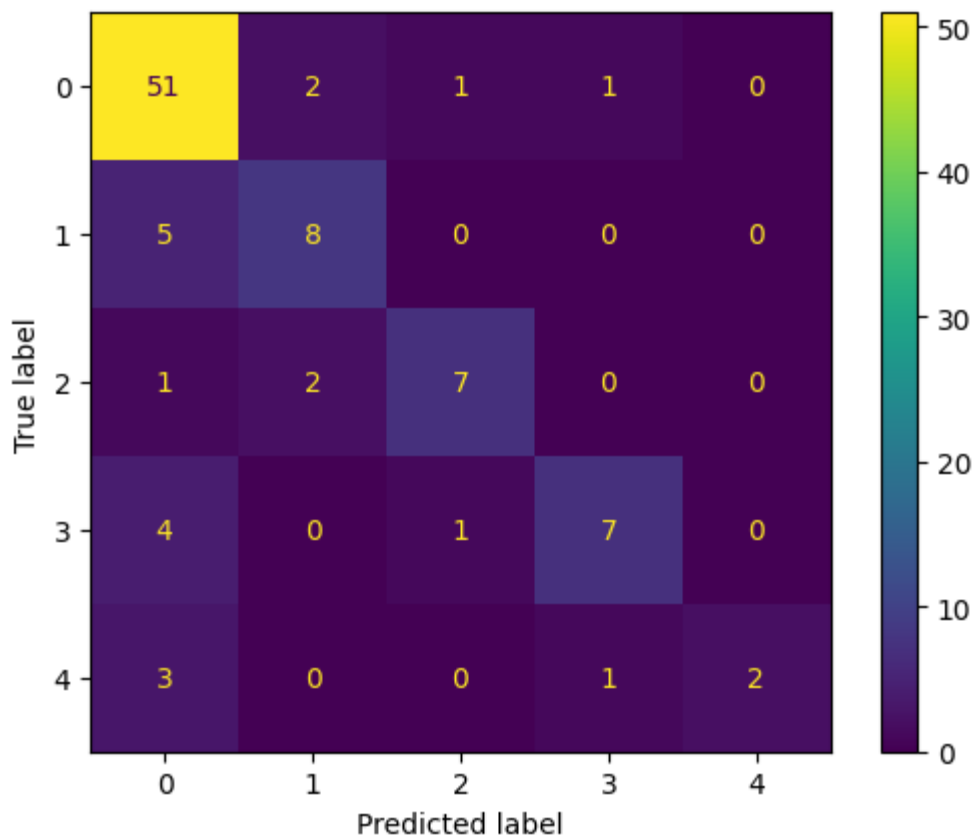

**Supplementary Figure 3.** Validation error matrix for geriatrician 1.

# SUPPLEMENTARY DATA

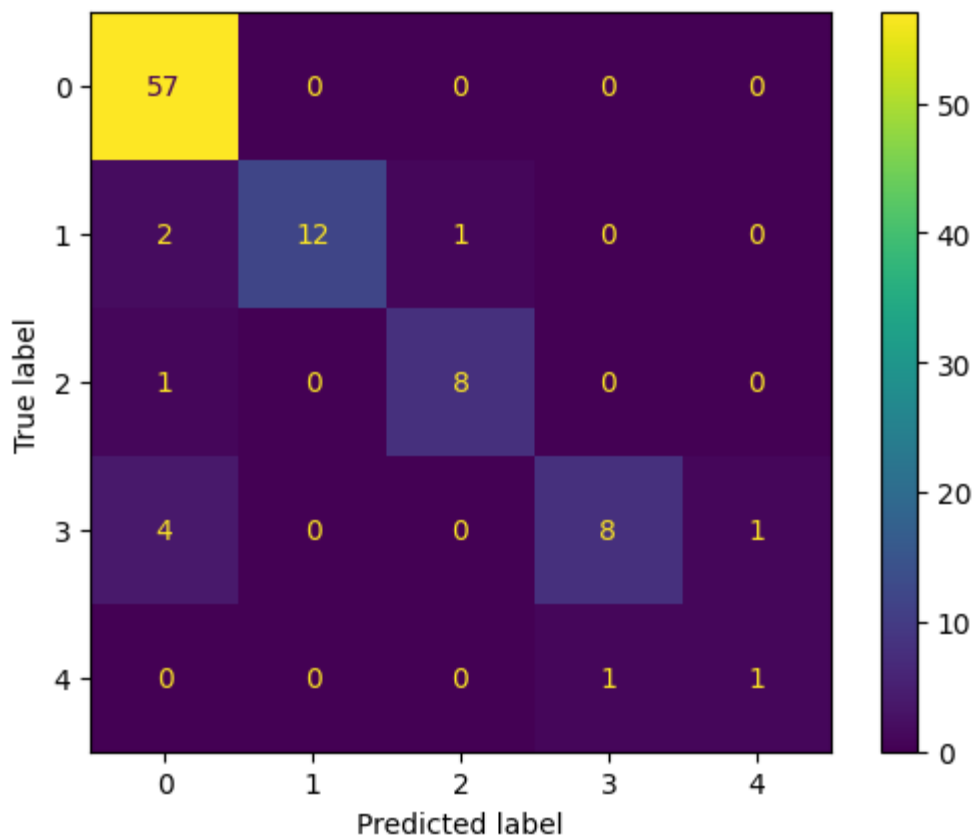

**Supplementary Figure 4.** Validation error matrix for geriatrician 2.
